# Supplementary material for: Single Cell Sequencing Analysis Identifies Genetics-Modulated ORMDL3+ Cholangiocytes Having Higher Metabolic Effects On Primary Biliary Cholangitis
Source: Research Square preprint supplement (doi:10.21203/rs.3.rs-922624/v1), 2021-09-24

**Supplemental Figures**

**Supplemental Figure S1. Circus plot showing the results of gene-level genetic association analysis of GWAS summary statistics on PBC.** Note: This analysis was performed using the MAGMA software. A circular symbol in the outer ring stands for a given gene, and color of a circular symbol represents the statistical significance of a specific gene, i.e., red color marks genes significantly associated with PBC with FDR ≤ 1×10-8, orange color marks genes significantly associated with PBC with FDR ranging from 1×10-8 to 0.001, light blue indicates genes significantly associated with PBC with FDR ranging from 0.001 to 0.05, and dark blue indicates genes showing non-significant associations with PBC (FDR > 0.05). There were 563 genes showing significant associations with PBC (FDR ≤ 0.05).

**
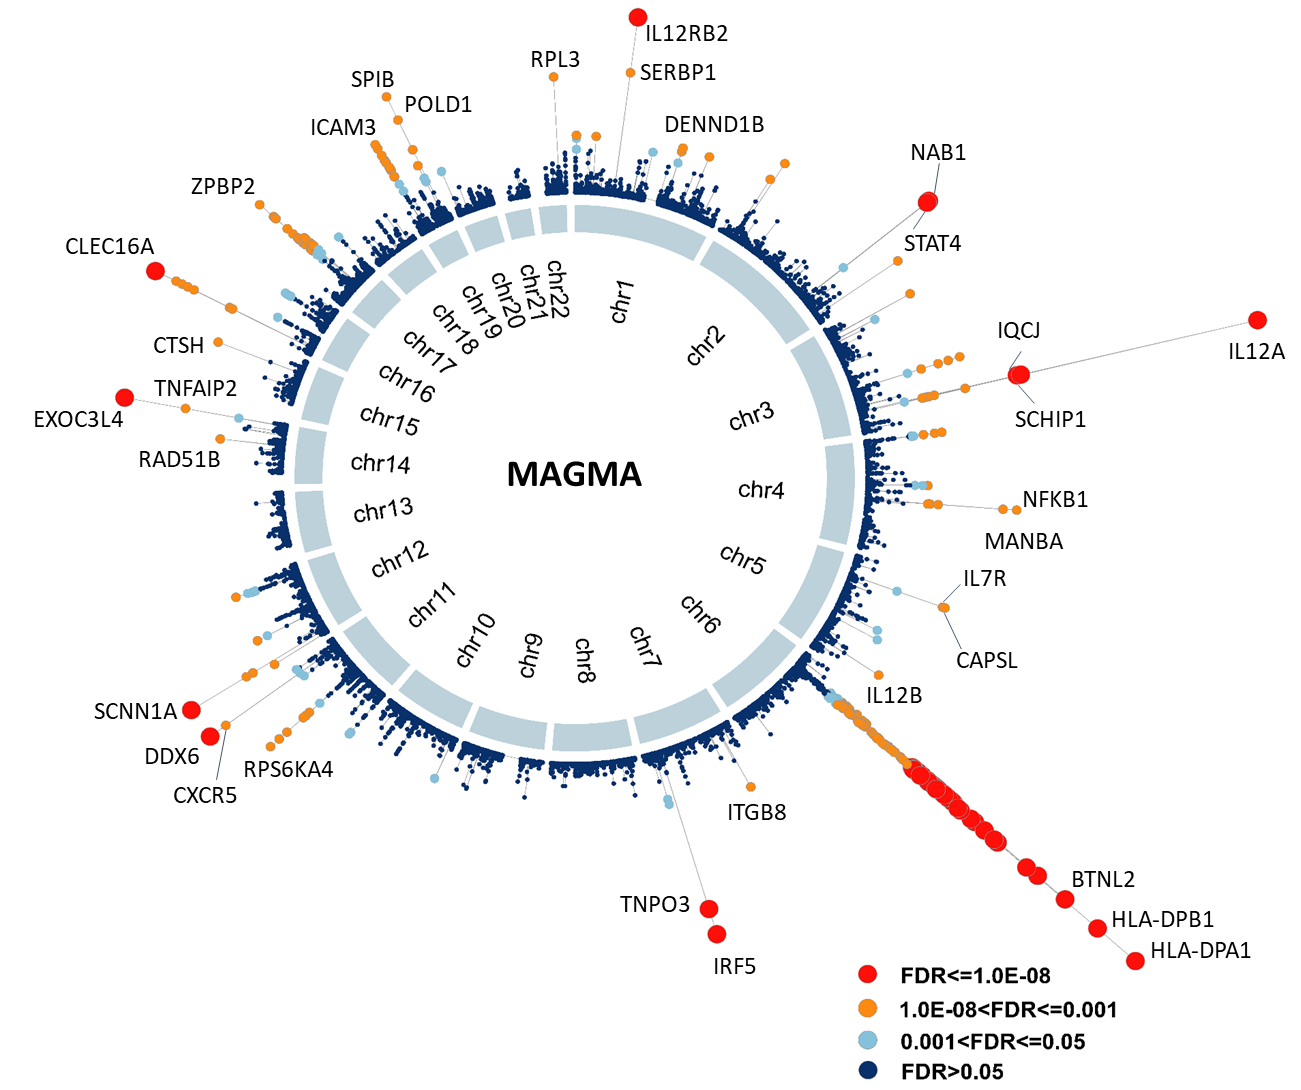
**

**Supplemental Figure S2. MAGMA-based functional annotation analysis for GWAS summary data.** a) MAGMA-based pathway enrichment analysis based on GWAS summary data on PBC. b) Multidimensional scaling analysis of 41 significant pathways identified MAGMA-based pathway analysis. Note: Circular ring size represents the number of each enriched pathway. Color stands for the exponent function transformed *beta* value of each enriched pathway. Number of circular ring in the plot represents the pathway ID as shown in the Supplemental Table S3.


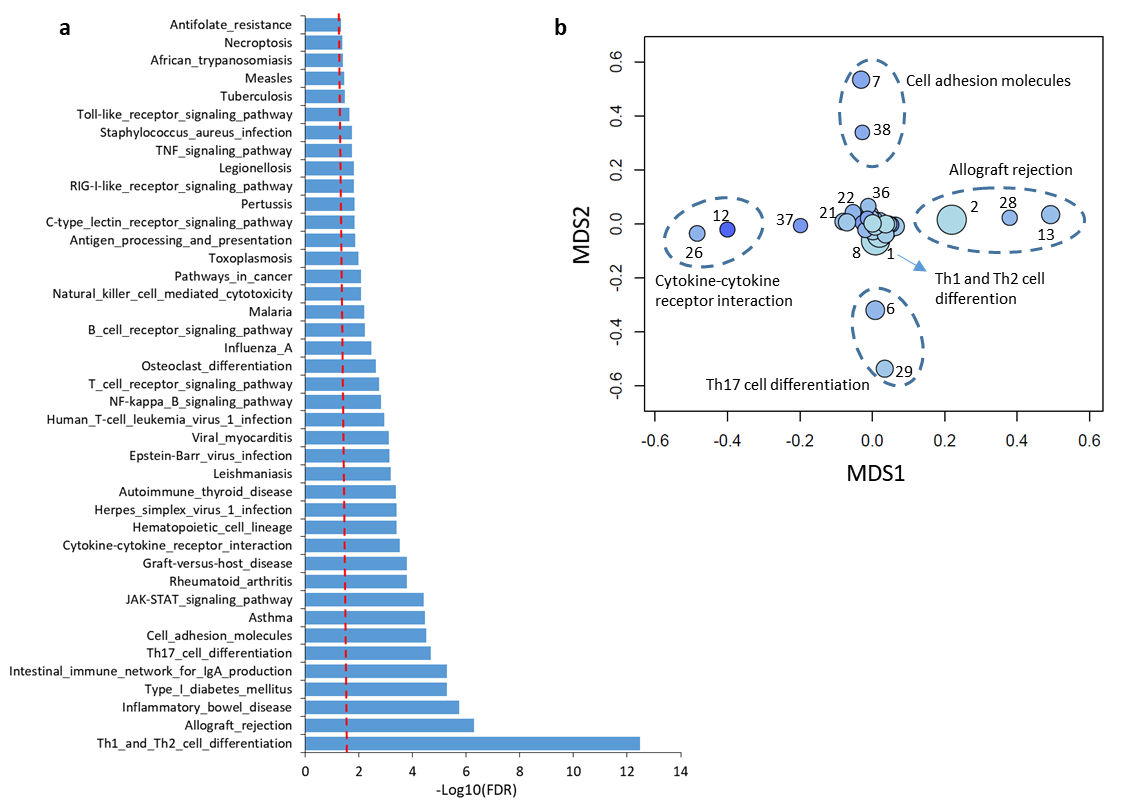


**Supplemental Figure S3. Results of MAGMA gene-property analysis based on the web-access tool of FUMA.** Gray color means non-significant enrichment. Orange color stands for significant enrichment.


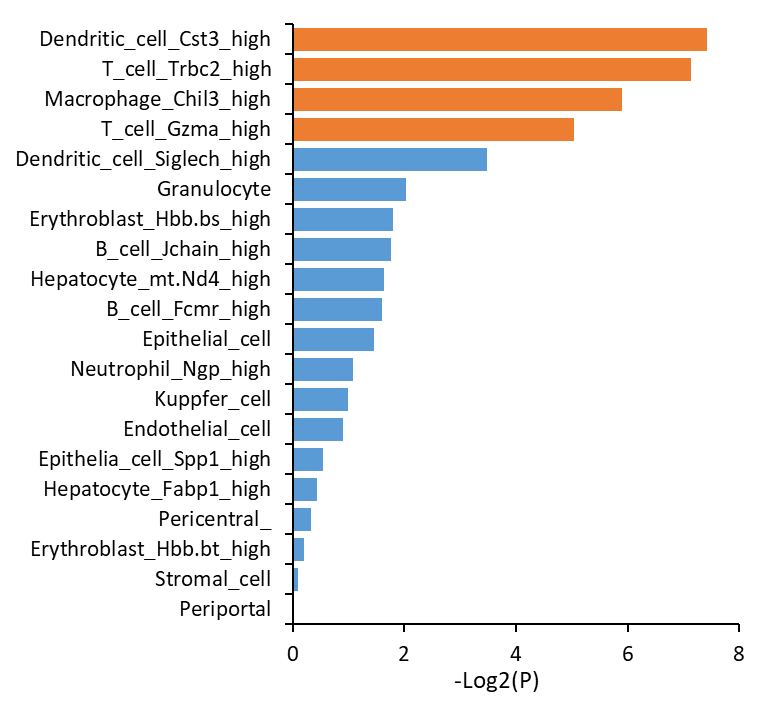


**Supplemental Figure S4. Venn plot shows the overlap of results between MAGMA and S-MultiXcan analysis.** Note: There is a high overlap rate of 86.6% (232/268) between significant genes from S-MultiXcan analysis and that from MAGMA analysis.


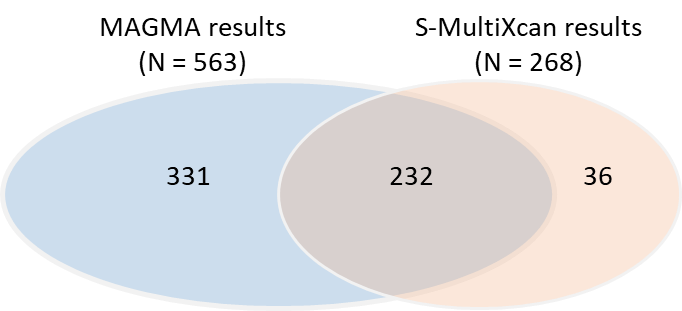


**Supplemental Figure S5. Permutation analysis of 100,000 times for results from MAGMA and S-PrediXcan (liver and blood) compared with results from S-MultiXcan across multiple tissues.** a) for the comparison between MAGMA and S-MultiXcan (the observed number of overlapped genes is 232, permuted P < 1×10-5); b) for the comparison between S-PrediXcan on liver and S-MultiXcan (the observed number of overlapped genes is 64, permuted P < 1×10-5), and c) for the comparison between S-PrediXcan on blood and S-MultiXcan (the observed number of overlapped genes is 91, permuted P < 1×10-5). Note: the observed gene from each method was based on the significant threshold at FDR ≤ 0.05.


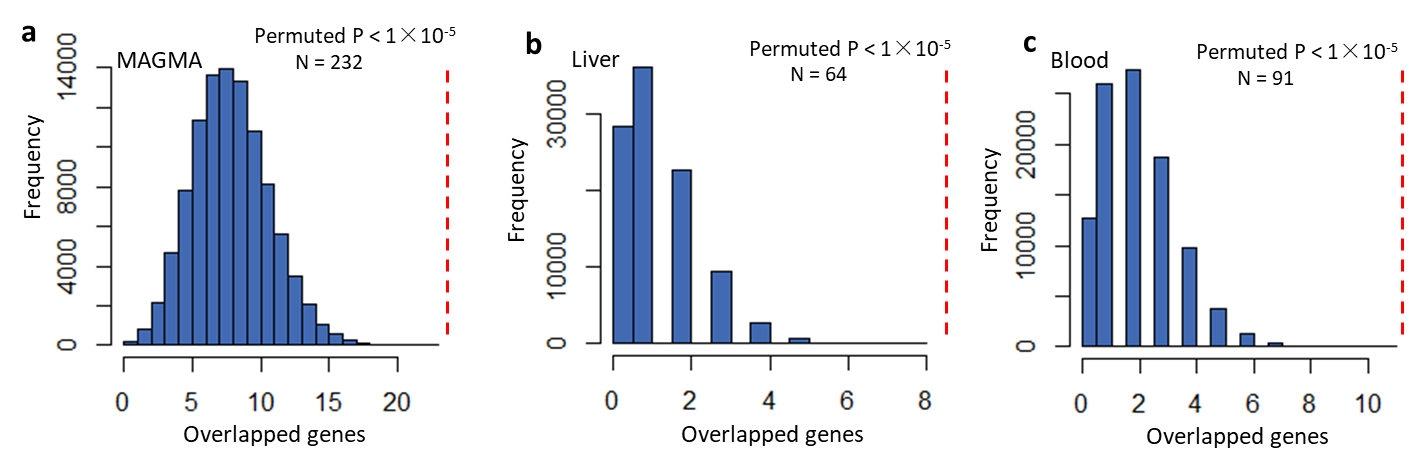


**Supplemental Figure S6. Differential gene expression analysis of 29 risk genes based on bulk RNA profiles of liver tissue (Dataset of GSE159676).** a)-e) Violin plot showing the significantly differential expressions of genes in the dataset of GSE159676 between healthy controls and PBC patients.


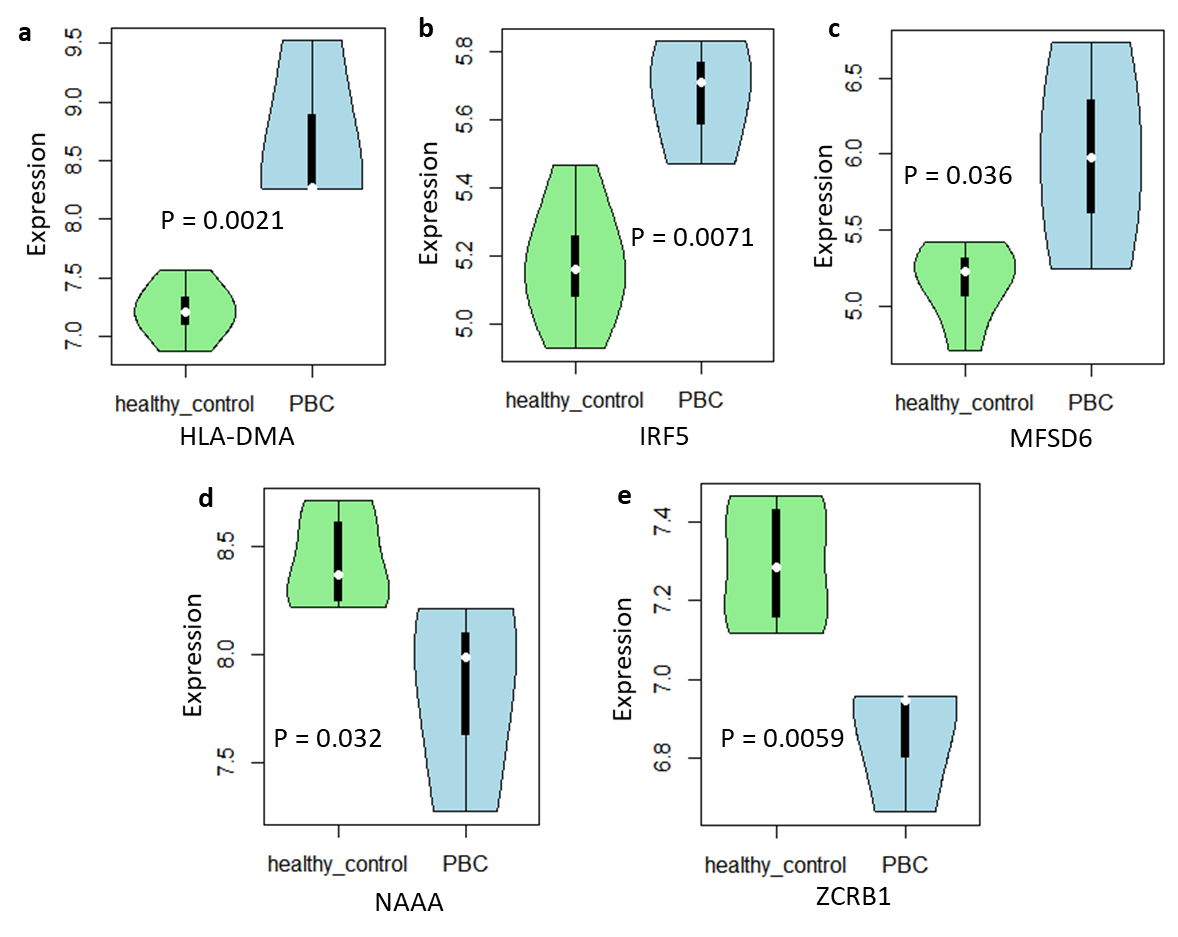


**Supplemental Figure S7. Differential gene expression analysis of 29 risk genes based on bulk RNA profiles of blood tissue (Dataset of GSE119600).** a)-m) Violin plot showing the significantly differential expressions of genes in the dataset of GSE119600 between healthy controls and PBC patients.


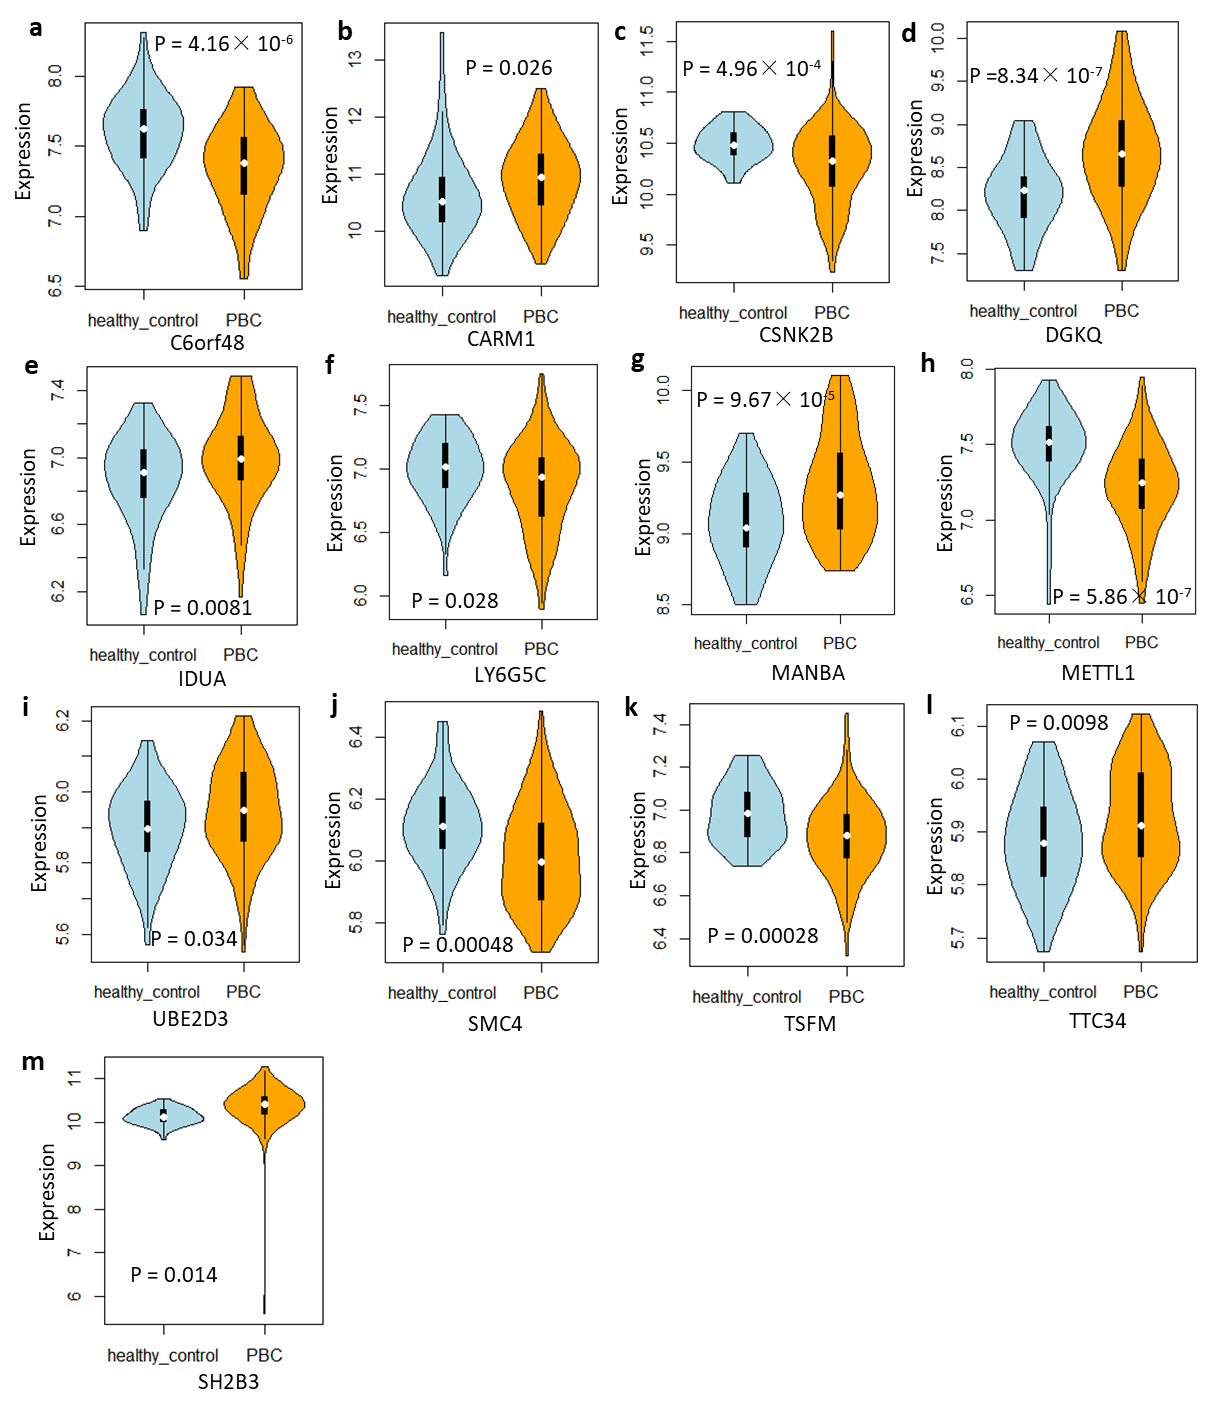


**Supplemental Figure S8. Differential gene expression analysis of 29 risk genes based on bulk RNA profiles in CD4+T cells (Dataset of GSE93170).** a) Results of co-expression patterns among 29 genes in CD4+T cells between control group and PBC group. b)-i) Boxplot showing the significantly differential expression of genes in CD4+T cells between healthy control and PBC patients. b) CSNK2B, c) DDAH2, d) KPNA4, e) SOCS1, f) TSFM, g)SYNGR1, h) UBE2D3, i) ZCRB1.


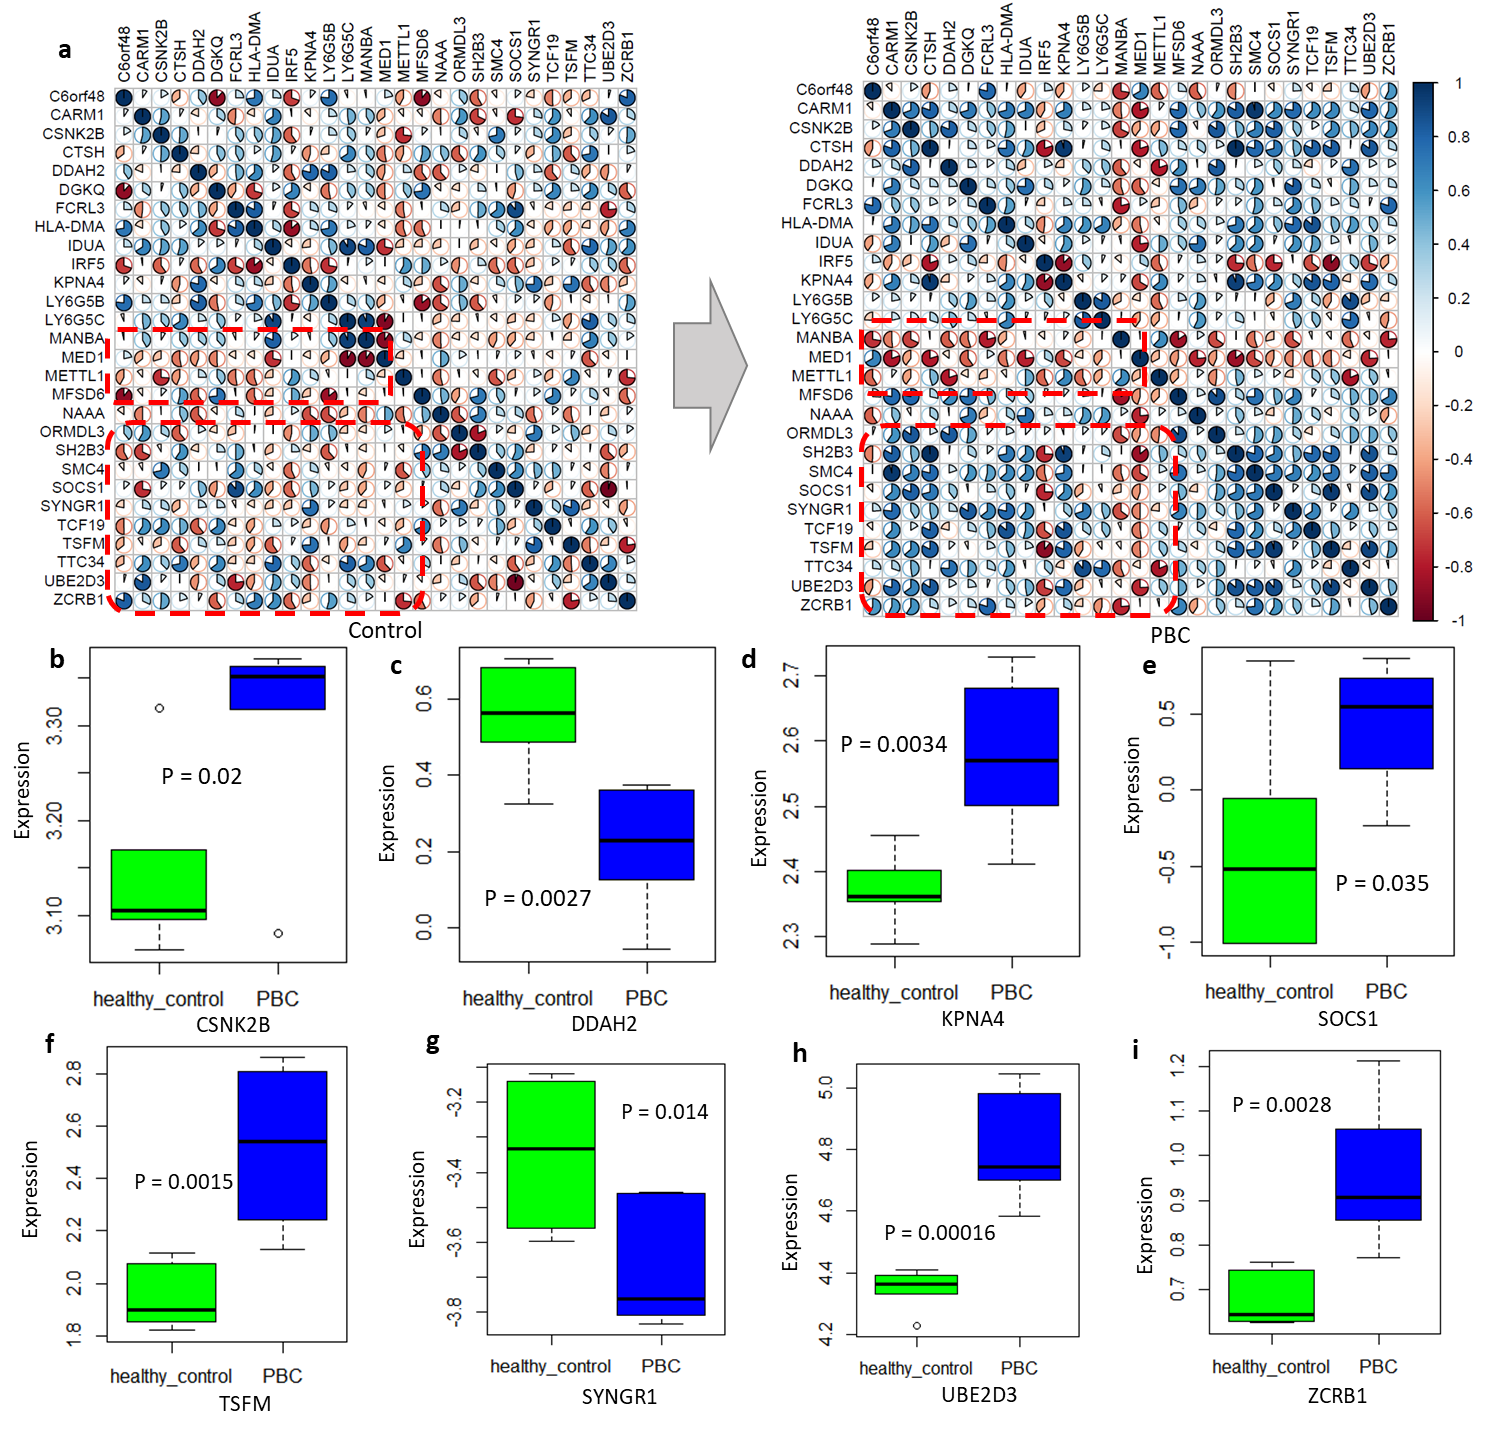


**Supplemental Figure S9. Functional characterization of 29 risk associated with PBC**. a) Schematic diagram showing the literature mining and GWAS catalog searching for novel PBC-risk genes. b) Phenotype-based enrichment analysis based on the GLAD4U database for 29 risk genes.


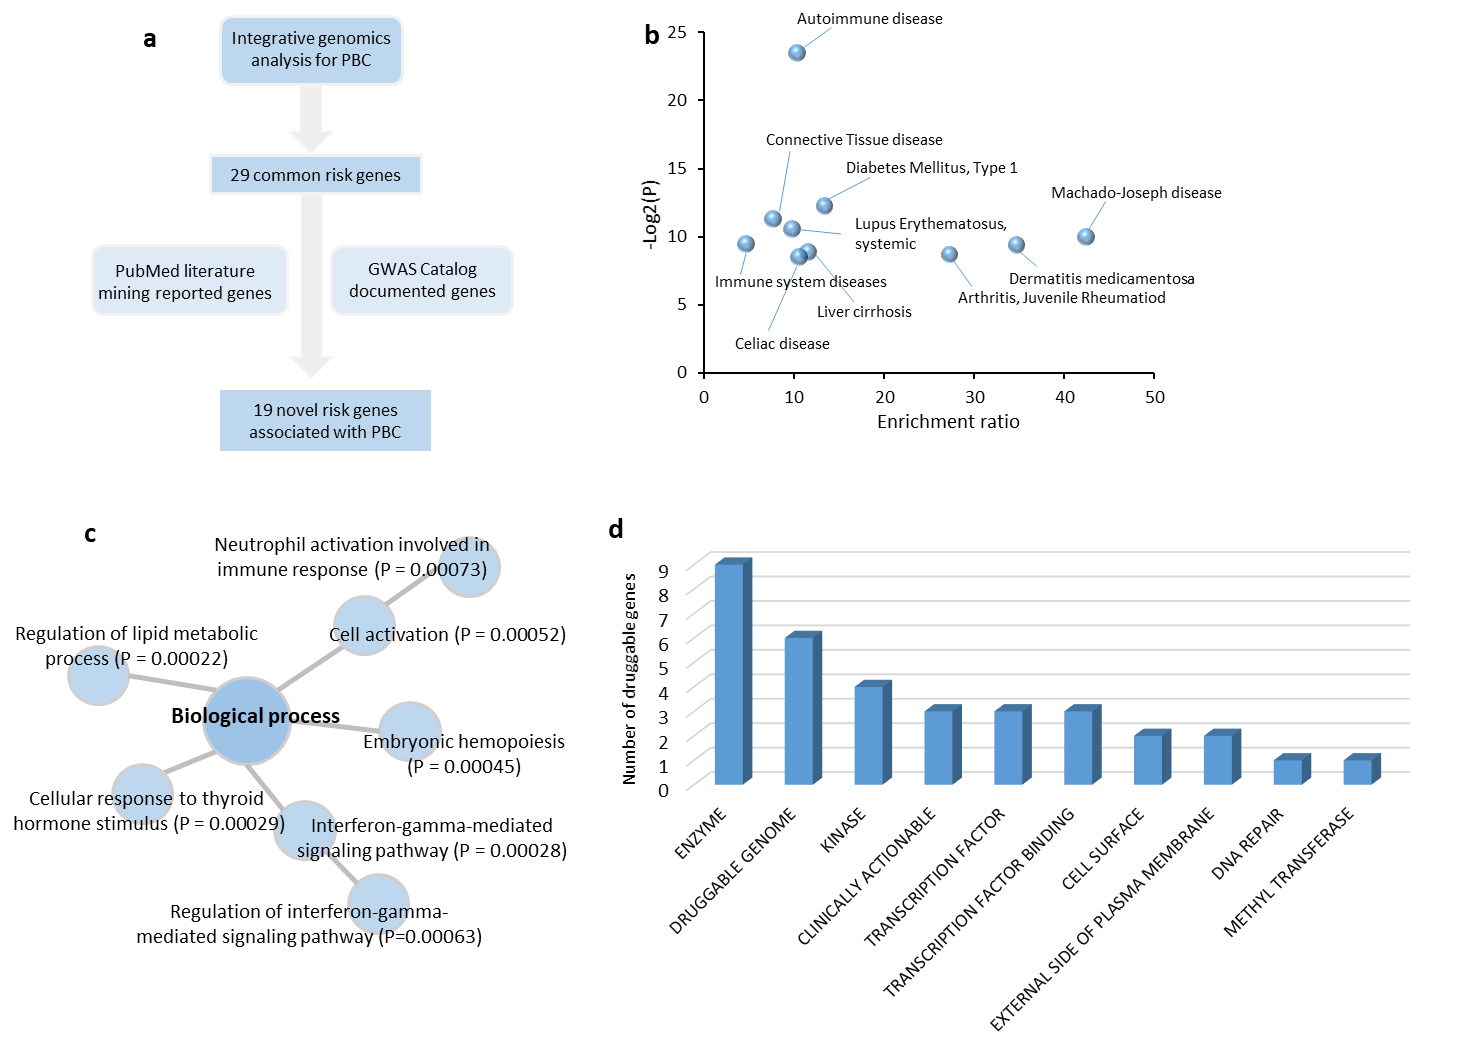


**Supplemental Figure S10. Functional enrichment analysis of GO-term of biological process for 29 PBC-risk genes.**


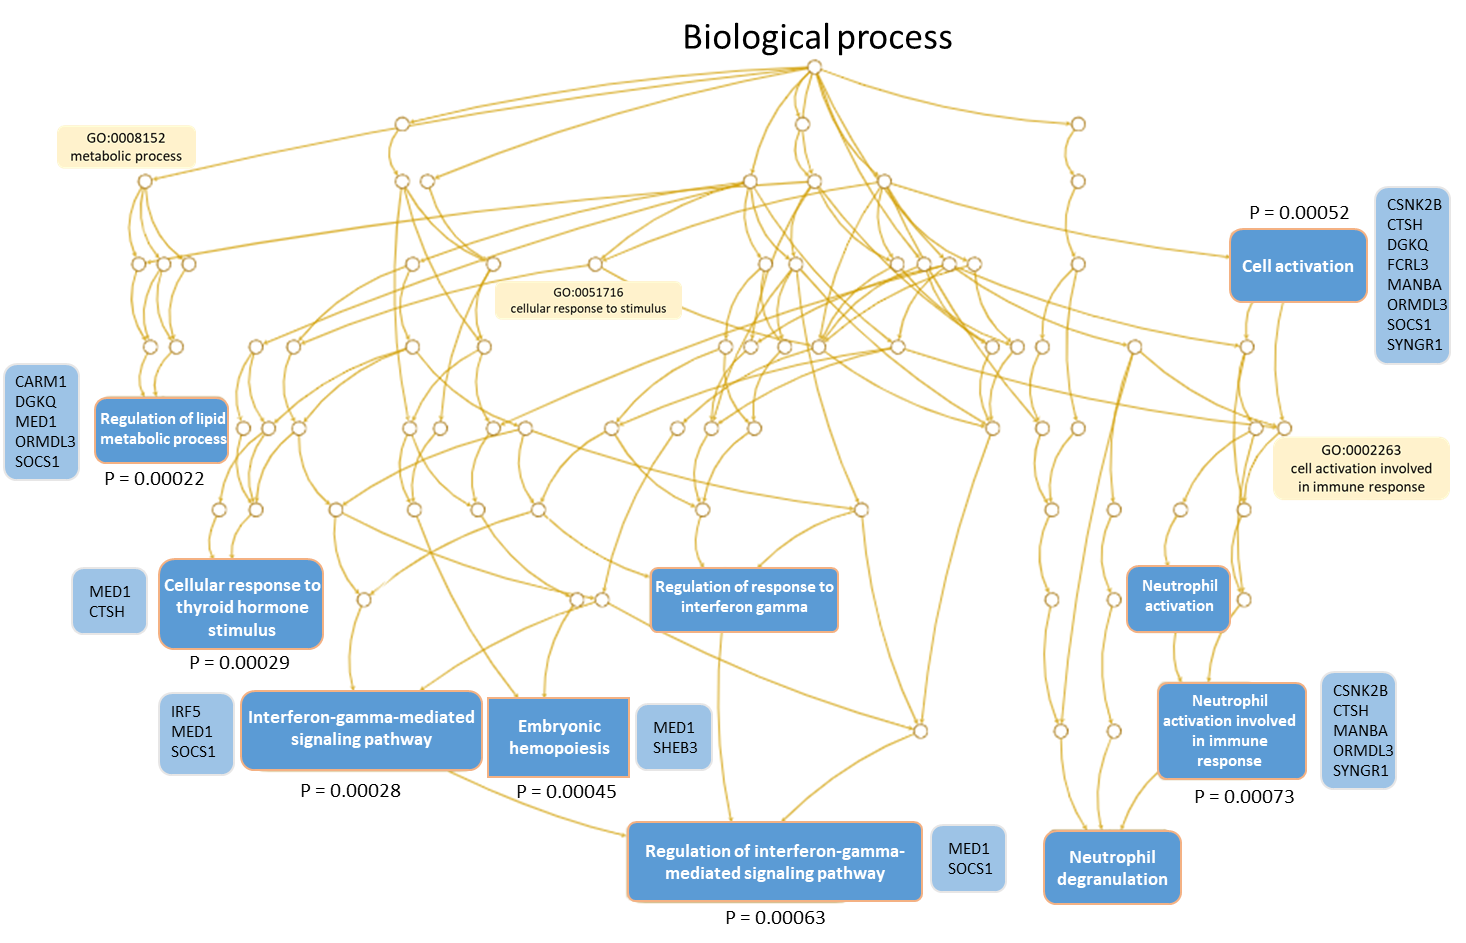


**Supplemental Figure S11. Functional enrichment analysis of GO-term of cellular components for 29 PBC-risk genes.**


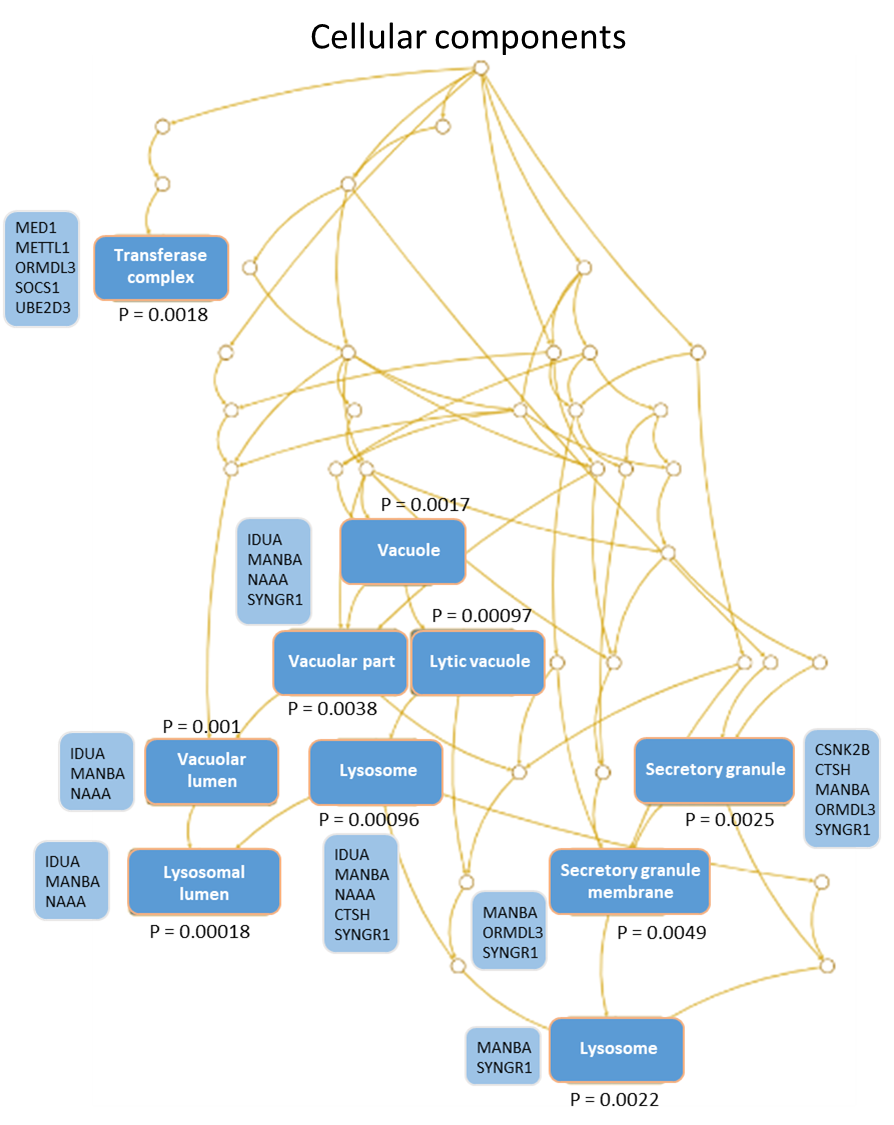


**Supplemental Figure S12.** **Functional enrichment analysis of GO-term of molecular function for 29 PBC-risk genes.**


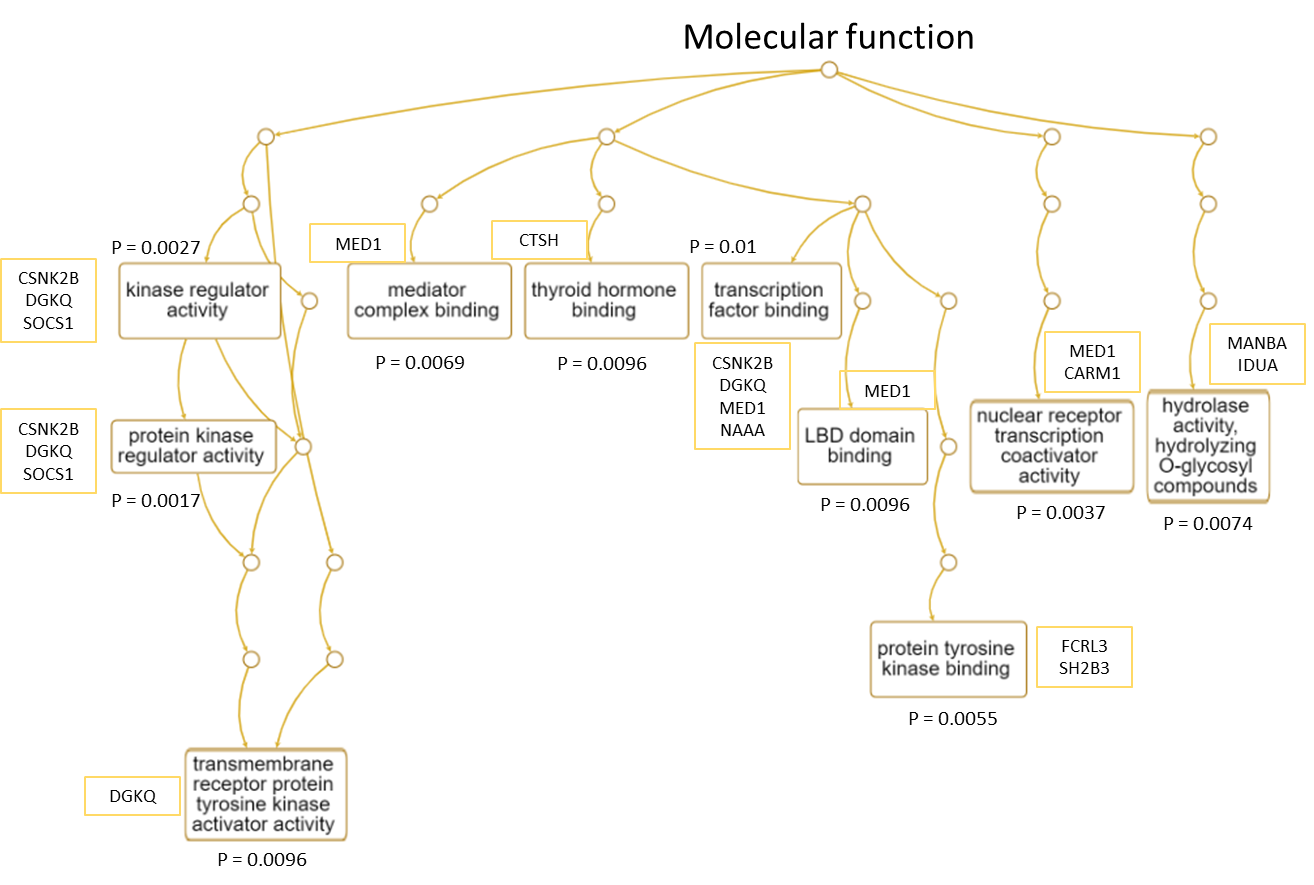


**Supplemental Figure S13. Gene-drug interaction analysis for these identified PBC-associated risk genes.** a) Drug-gene interaction analysis showing 10 druggable gene categories. b) Drug-gene subnetwork. Note: Orange ring represents a specific gene, and blue triangle represents a given drug. The drug-gene interactions were plotted on the basis of the DGIdb database (<https://www.dgidb.org/>).

**
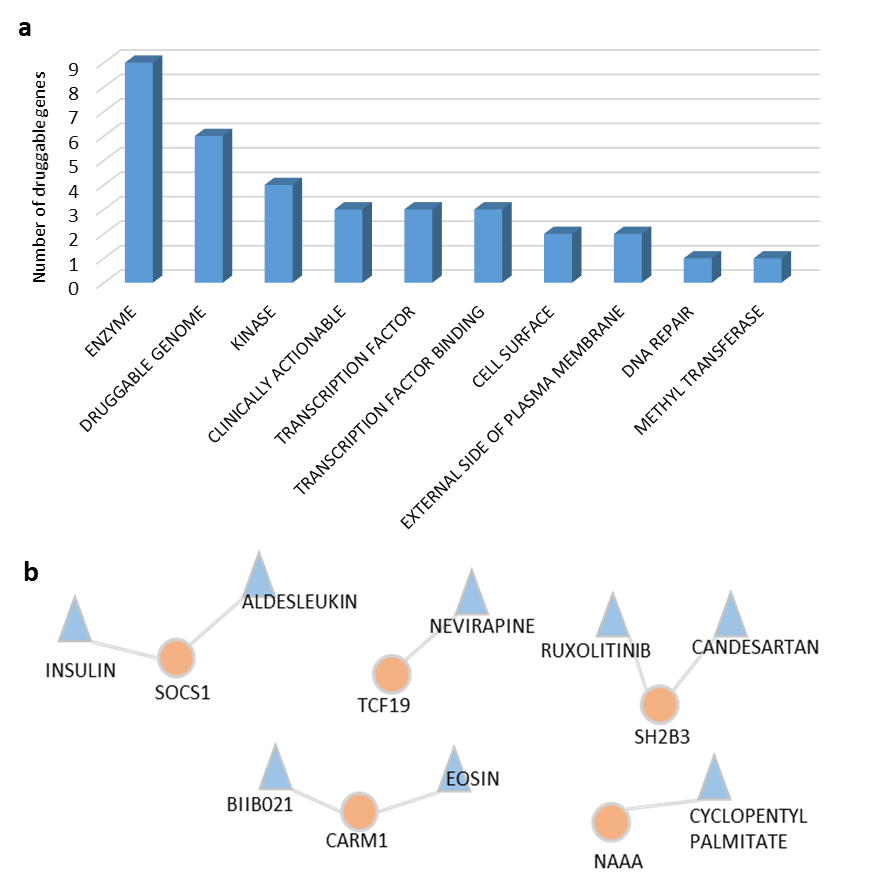
**

**Supplemental Figure S14.** **Box plots showing the effects of different genotypes (CC, CT, and TT) of rs9303277 on the expression of *ORMDL3* among different immune cell types.** This dataset was based on the Database of Immune Cell Expression quantitative trait loci and Epigenomics (DICE, <https://dice-database.org/landing>)


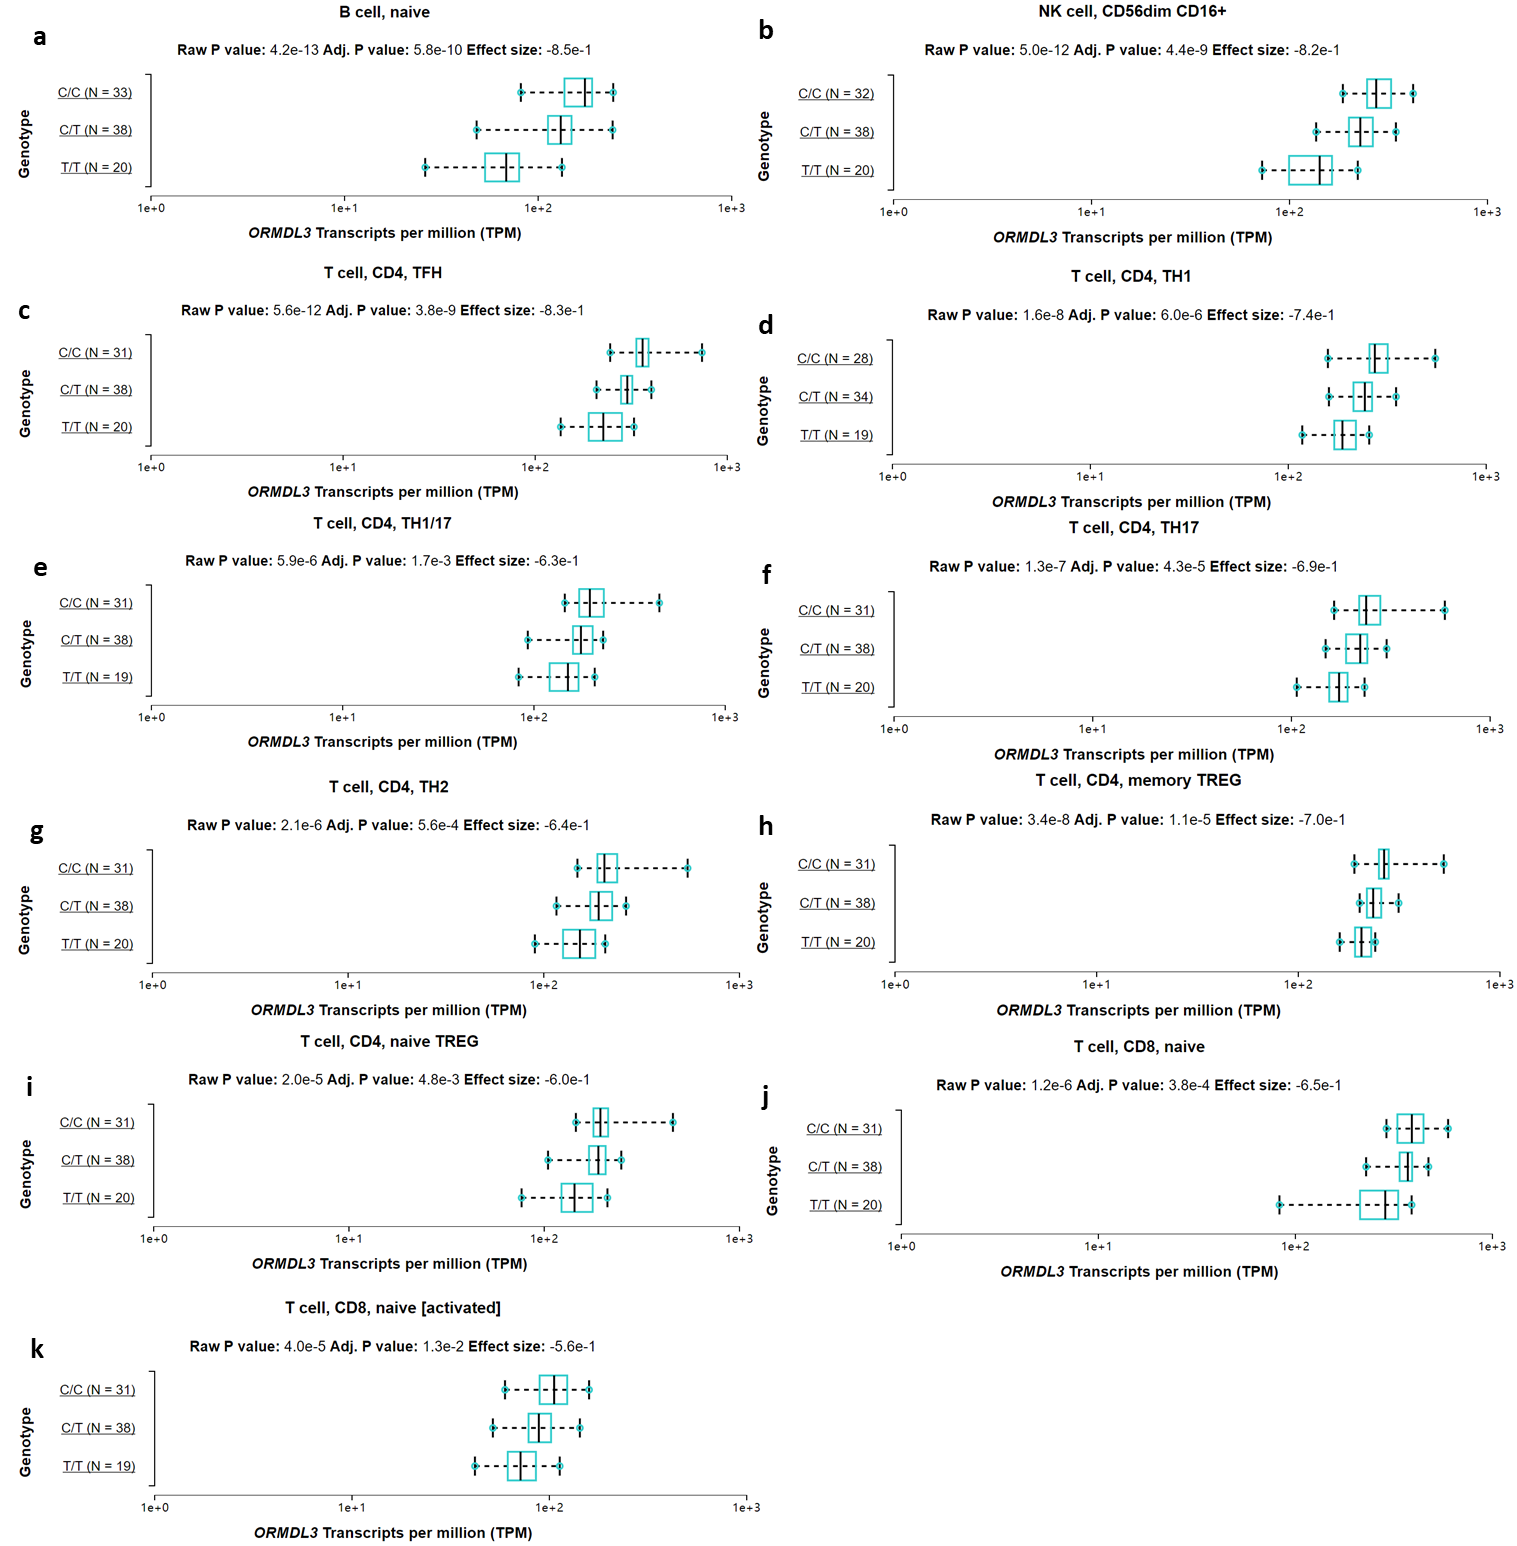


**Supplemental Figure S15. Functional enrichment analysis of differential expressed genes between *ORMDL3*+ and *ORMDL3*- cholangiocytes.** (a) 6 up-regulated DEGs based on the KEGG pathway resource. b)-d) GO enrichment analyses of 71 down-regulated DEGs according to three categories: (b) biological process, (c) cellular component, and (d) molecular function. FDR < 0.05 represents a significantly enriched pathway or GO-term.


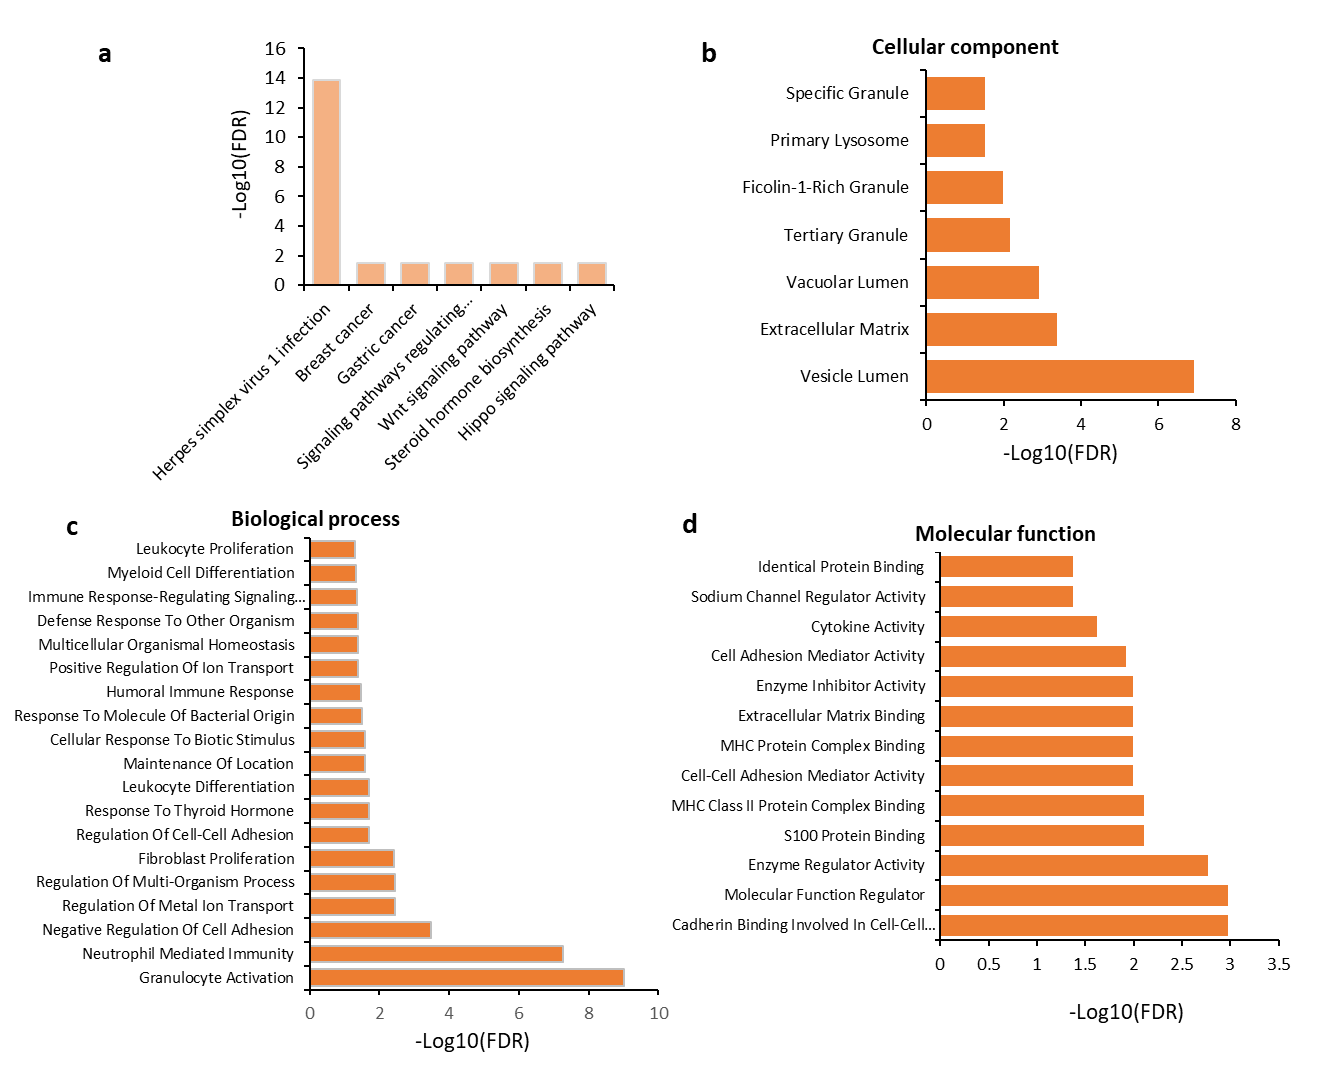


### Supplemental Figure S16. Identify signals contributing most to outgoing (sources) or incoming (targets) signaling of cell populations in liver tissues (GSE115469). (a) Outgoing signaling patterns among 13 cell types, (b) Incoming signaling patterns among cell types. The color of heatmap represents the relative strength of cellular interactions.

**
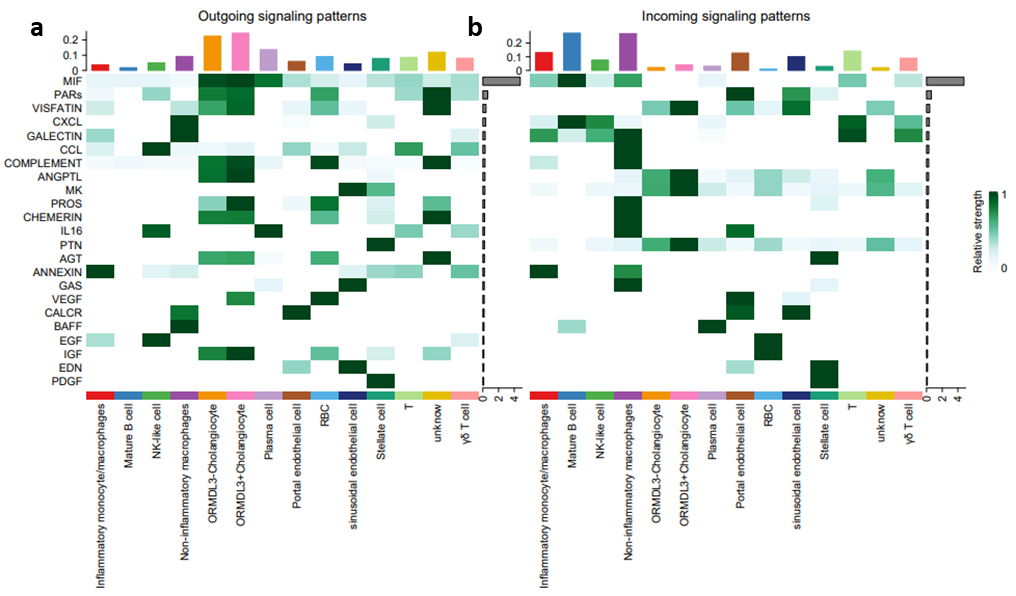
**

**Supplemental Figure S17. The aggregated cell-to-cell communication network among cell populations in liver tissues (GSE115469).** The width represents the number of cellular interactions.


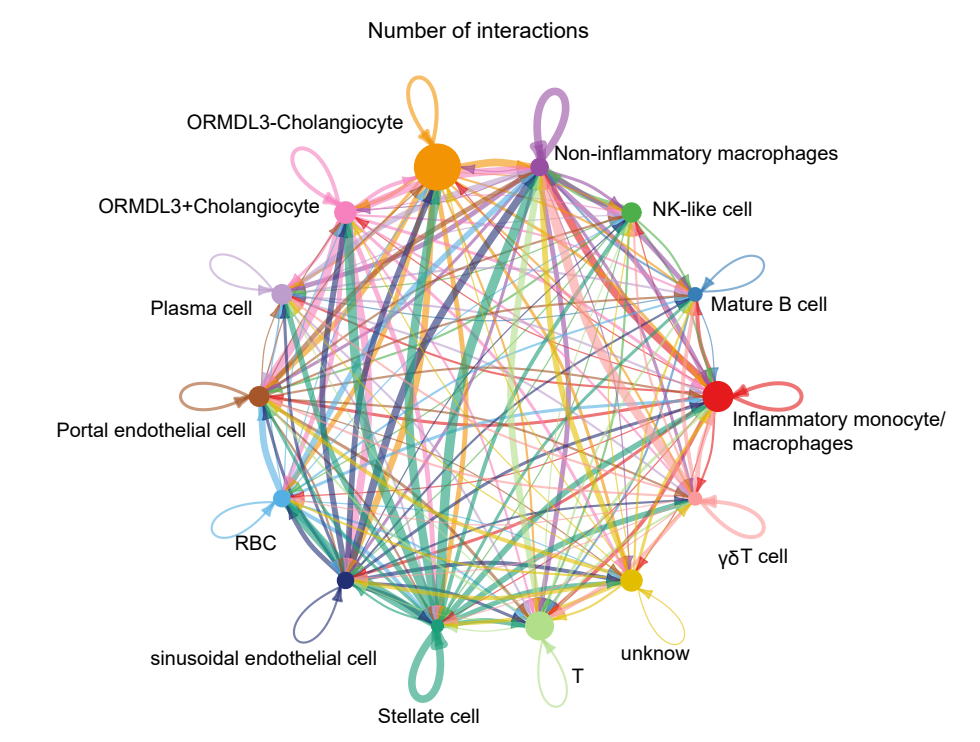


**Supplemental Figure S18. The cellular communications of *ORMDL3-*Cholangiocyte with other cell populations in liver tissues (GSE115469).** The width represents the number of cellular interactions, and color represents each cell type.


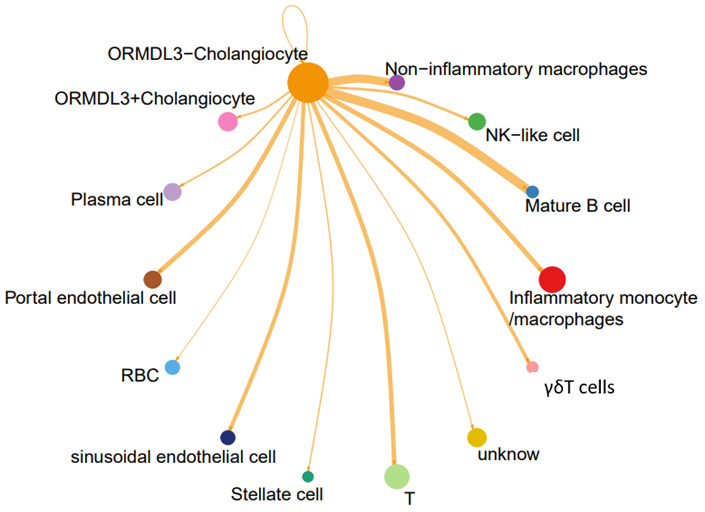


**Supplemental Figure S19. Dot plots showing that predicted cellular interactions of *ORMDL3-*Cholangiocyte with other cell populations in liver tissues (GSE115469).** (a) *ORMDL3-*Cholangiocyte as a source (outgoing) communicating with other cells, (b) *ORMDL3-*Cholangiocyte as a target (incoming) communicating with other cells. The circular size of represents the statistical significance of each ligand-receptor pair, and color represents the communication probability.


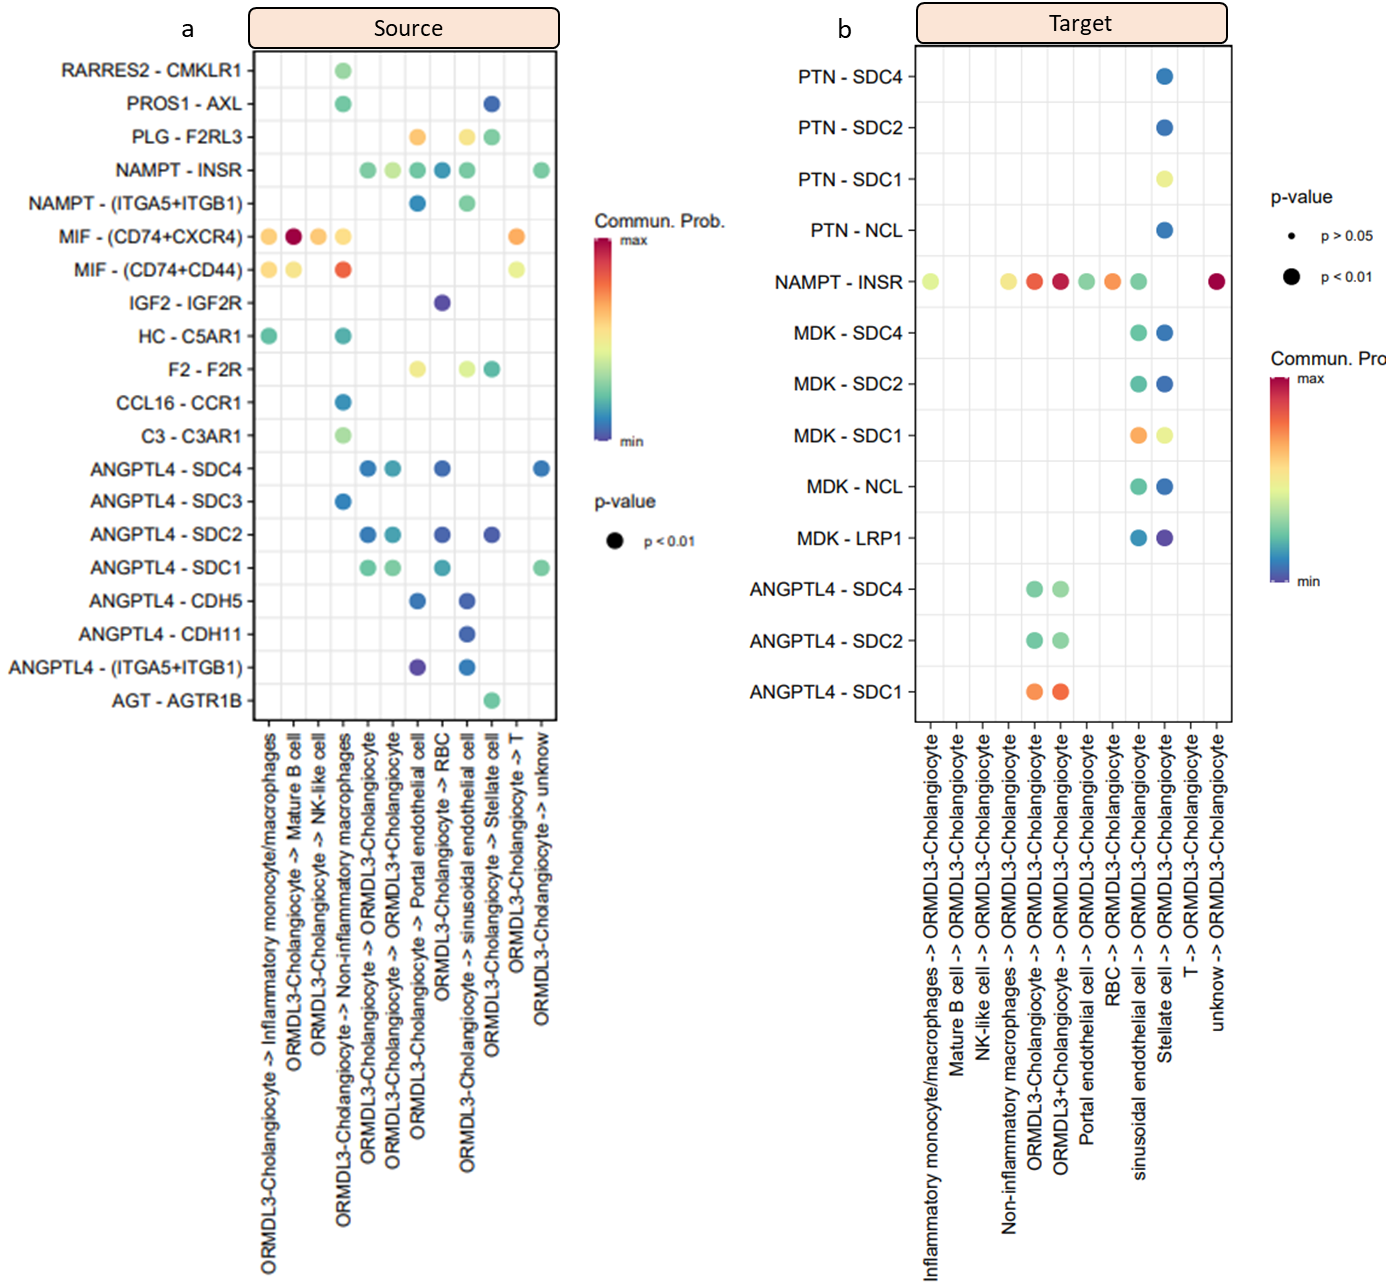


**Supplemental Figure S20. The inferred incoming (target) communication patterns of cell populations in liver tissue (GSE115469).** (a) Five incoming communications patterns of 13 cell populations, which shows the correspondence between the inferred latent patterns and cell groups, as well as signaling pathways, (b) The contribution of signaling pathways among the five incoming communications patterns to liver and immune cell types.


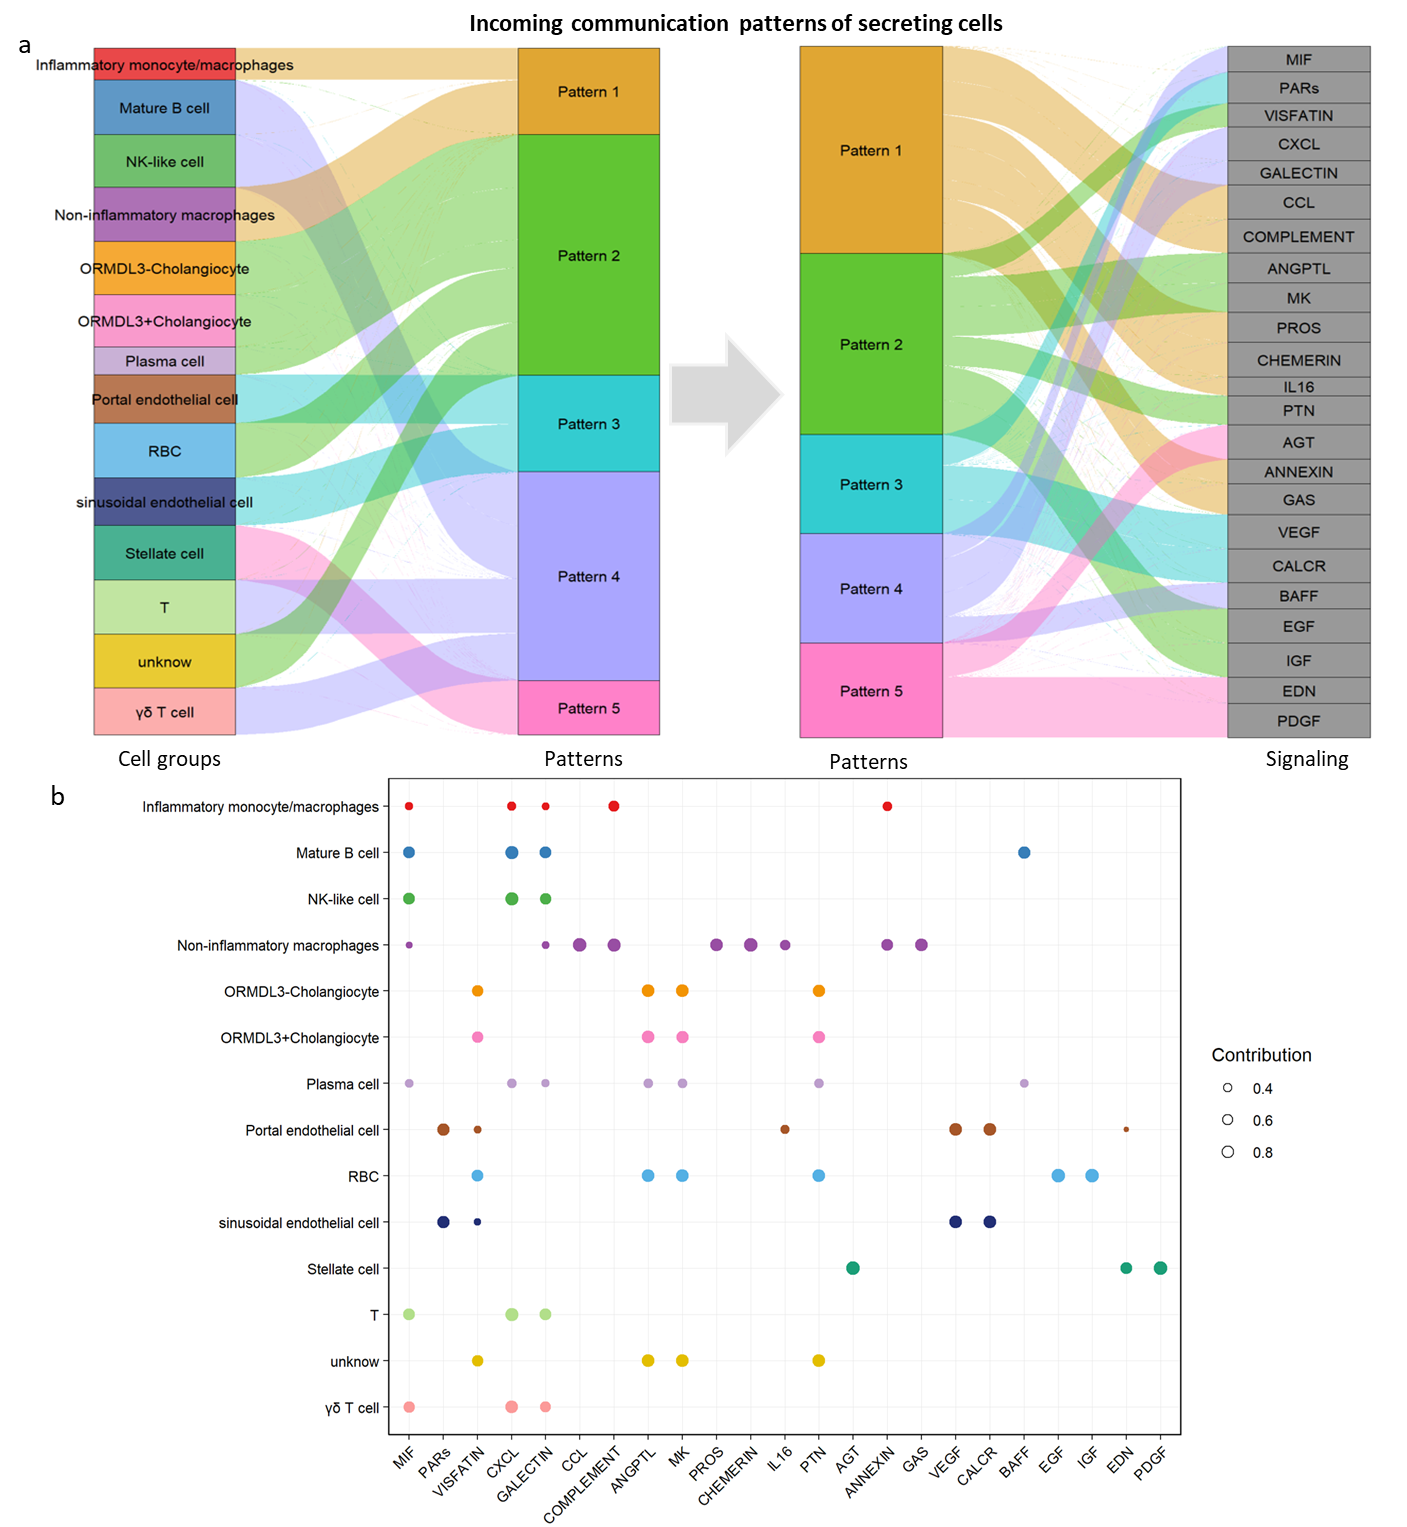


**Supplemental Figure S21. Relative contribution of each ligand-receptor pair to that of VEGF signaling pathway.** The relative contribution is the ratio of the total communication probability of the inferred network of each ligand-receptor pair to that of VEGF signaling pathway.


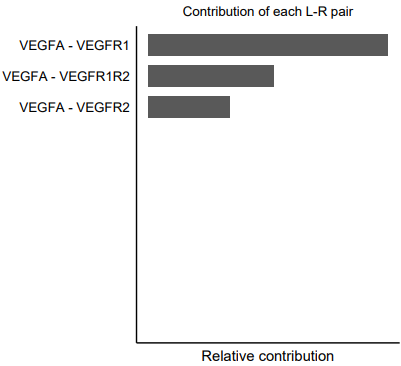

Supplement: Supplementary file 1 [file 710c2164515f24d131d6259c.docx]
